# Supplementary material
Source: publisher figshare collection journal article supplement (https://future-science-group.figshare.com/ndownloader/files/19981397)
Supplement: Supplementary file 1 [file 19981397]

## Sheet: Sheet1
	Experiment 1	Parasitaemia, %
		Predicted	Count 1	Count 2	Actual
		1	1.16	1.44	1.3
		0.1	0.1	0.09496	0.09748
		0.01	NT	NT	NT
		0	NA	NA	NA
	Experiment 2	Parasitaemia, %
		Predicted	Count 1	Count 2	Actual
		1	0.88	0.79	0.835
		0.1	0.09	0.09	0.09
		0.01	NT	NT	0.01
		0	NA	NA	NA
	Experiment 3	Parasitaemia, %
		Predicted	Count 1	Count 2	Actual
		1	0.91	0.95	0.93
		0.1	0.099	0.097	0.098
		0.01	NT	NT	NT
		0	NA	NA	NA
		NT: Not tested
		NA: Not applicable
